# Supplementary material for: Autoantibody profiling of patients with immune checkpoint inhibitor-associated myocarditis: a pilot study
Source: Front Immunol. 2024 Sep 11;15:1423622. doi: 10.3389/fimmu.2024.1423622 (PMC11422215; doi:10.3389/fimmu.2024.1423622)
Supplement: Supplementary file 2 [file Table2.xlsx]

## Sheet: Case 1
Name	ID	Fold change （post/pre BSA）	log2FC	p value	minus log 10 p value
EIF4EBP3	JHU01572.P017D05	37.8729	5.24309	0.00298864	2.52453
C20orf24	JHU15674.P165D06	9.12324	3.18955	0.00621095	2.20684
FNDC8	JHU00806.P009D09	6.74231	2.75324	0.0131952	1.87959
CELF1	JHU04248.P045C10	6.28663	2.65229	0.000343879	3.46359
CCDC94	JHU07414.P078H07	5.92635	2.56714	0.0242425	1.61542
PEX19	JHU02653.P028A10	5.16752	2.36947	0.000849924	3.07062
TAX1BP1	JHU07577.P079H12	5.01157	2.32526	0.00407468	2.38991
RCOR2	JHU06984.P227F07	4.89527	2.29139	0.00243843	2.61289
ANXA2	JHU13600.P143B12	4.86996	2.28391	0.00510656	2.29187
CLDN7	JHU05017.P234D08	4.75747	2.25019	0.0045704	2.34005
MXRA8	JHU19036.P193C09	3.53719	1.8226	0.0165224	1.78193
TFG	JHU01525.P016A12	3.28112	1.71419	0.0175209	1.75644
ME3	JHU18383.P211D07	3.25217	1.7014	0.000711939	3.14756
RBPMS	JHU14781.P155A06	3.18772	1.67252	0.00473476	2.3247
ZFP64	JHU14071.P180D06	3.08524	1.62538	0.000110051	3.95841
TCP11	JHU16041.P168G04	2.8527	1.51233	0.00148095	2.82946
OR2M3	JHU06288.P066G01	2.85126	1.5116	0.0131897	1.87976
EIF4H	JHU01573.P017E07	2.76481	1.46718	0.0121217	1.91644
ELP5	JHU15292.P161G01	2.73759	1.45291	0.00348367	2.45796
PDZRN4	JHU11001.P115D10	2.59579	1.37617	0.00665451	2.17688
RPL13A	JHU00641.P029G05	2.58829	1.372	0.0209931	1.67792
AP1B1	JHU18650.P215C12	2.57348	1.36372	0.0319969	1.49489
DHX30	JHU24164.P240A04	2.55957	1.3559	0.0236066	1.62697
RQCD1	JHU15172.P159H02	2.54344	1.34678	0.025812	1.58818
TXNRD1	JHU14255.P149D12	2.5187	1.33268	0.00428696	2.36785
ITK	JHU15712.P165G06	2.49473	1.31888	0.000858171	3.06643
FAXC	JHU07788.P082G03	2.47253	1.30599	0.0202763	1.69301
RBPMS	JHU16129.P169H10	2.45473	1.29557	0.0417266	1.37959
SPINT2	JHU13869.P145G01	2.24166	1.16457	0.00375097	2.42586
SLC44A5	JHU01712.P234B12	2.19421	1.1337	0.00432523	2.36399
TPST2	JHU13203.P138G08	2.1939	1.13349	0.0272292	1.56497
PHF1	JHU23963.P240A10	2.15959	1.11076	0.00740493	2.13048
ABAT	JHU01826.P020H01	2.15652	1.10871	0.0013197	2.87953
NOX1	JHU15727.P165F06	2.14559	1.10138	0.0112539	1.9487
ICAM4	JHU08865.P093D01	2.14542	1.10126	0.00706576	2.15084
CLEC7A	JHU15301.P161H03	2.11092	1.07787	0.00728585	2.13752
MS4A3	JHU09075.P095C01	2.10581	1.07438	0.0261383	1.58272
STAU2	JHU13570.P142H12	2.10425	1.07331	0.00797285	2.09839
HOXB9	JHU14014.P147G04	2.09516	1.06706	0.00879882	2.05558
KJ904347_frag	JHU07923.P083A06	2.09476	1.06679	0.0196211	1.70728
GAB1	JHU09535.P100A12	2.09397	1.06624	0.0353811	1.45123
MUC3B_frag	JHU19218.P195E07	2.08833	1.06235	0.000400336	3.39758
ZFP64	JHU04028.P190A01	2.06795	1.0482	0.00727781	2.138
CENPM	JHU14287.P150H11	2.067	1.04754	0.0162968	1.7879
RBM38	JHU14779.P155G06	2.04419	1.03153	0.0206189	1.68573
SPRR1A	JHU13674.P143G09	2.03768	1.02693	0.0371277	1.4303
PDS5B	JHU16458.P159H06	2.0192	1.01378	0.00633921	2.19796
C5orf22	JHU13991.P147H04	2.00744	1.00536	0.0183349	1.73672
CYB5R1	JHU01363.P015C04	0.497911	-1.00604	0.0271171	1.56676
NOL6	JHU02169.P023A06	0.493617	-1.01854	0.0481471	1.31743
CPA3	JHU01565.P017C12	0.493144	-1.01992	0.00222166	2.65332
APCS	JHU02019.P022A05	0.492545	-1.02167	0.0135451	1.86822
ODF2L_frag	JHU12413.P130F02	0.490097	-1.02886	0.0118628	1.92581
IFT22	JHU00265.P003B01	0.482628	-1.05102	0.00500288	2.30078
VSTM2L	JHU14816.P156F09	0.475308	-1.07306	0.0308735	1.51041
PPP1R7	JHU01111.P012B11	0.47421	-1.0764	0.034049	1.4679
TMCC1	JHU06227.P065G10	0.470022	-1.0892	0.00938639	2.0275
SASH3	JHU05675.P178D11	0.467133	-1.0981	0.00395338	2.40303
SYF2	JHU01332.P003A03	0.467011	-1.09847	0.00151412	2.81984
FIP1L1	JHU01087.P012C05	0.464771	-1.10541	0.0414918	1.38204
DDX17_frag	JHU00598.P007A02	0.46274	-1.11173	0.0119787	1.92159
NELFE	JHU01419.P015B10	0.461181	-1.1166	0.0277143	1.5573
COX11	JHU00594.P007A06	0.460956	-1.1173	0.0454786	1.34219
CNTD1	JHU03001.P032B03	0.458376	-1.1254	0.00612457	2.21292
NOSTRIN	JHU15153.P159F12	0.452557	-1.14383	0.0193933	1.71235
PEX3	JHU01026.P011A10	0.439795	-1.1851	0.020931	1.67921
FABP7	JHU00514.P006C07	0.429878	-1.218	0.0113855	1.94365
ARRDC4	JHU16062.P165G05	0.425522	-1.23269	0.0116016	1.93548
ERBB2IP	JHU12368.P130E01	0.425244	-1.23364	0.0166712	1.77803
ZSCAN18	JHU04031.P187B05	0.424448	-1.23634	0.0153344	1.81433
THOC7	JHU12045.P126E04	0.421523	-1.24632	0.00678407	2.16851
KLRC4	JHU00621.P007C09	0.409475	-1.28815	0.0398021	1.40009
ANAPC15	JHU03470.P037H02	0.404044	-1.30741	0.0068212	2.16614
KCTD17	JHU12963.P136C06	0.324136	-1.32786	0.00330353	2.48102
HPCAL1	JHU00320.P004F04	0.397624	-1.33052	0.0362253	1.44099
CNKSR1	JHU08559.P090E09	0.395937	-1.33666	0.0352621	1.45269
KCTD5	JHU12673.P234B06	0.366272	-1.44901	0.00158609	2.79967
ESYT2_frag	JHU00313.P004B04	0.362106	-1.46552	0.00632135	2.19919
C1orf43	JHU00298.P004B08	0.355911	-1.49041	0.0410701	1.38647
ARHGEF16	JHU05765.P061A02	0.288785	-1.79193	0.0179082	1.74695
BCL2	JHU13217.P139A09	0.269526	-1.89151	0.0137073	1.86305
TMEM123	JHU14254.P149A04	0.22875	-2.12816	0.00153651	2.81346
ZMPSTE24	JHU13398.P233B08	0.153399	-2.70464	0.024388	1.61282
MKNK1	JHU00052.P001A04	0.118435	-3.07783	0.0191885	1.71696

## Sheet: Case 2
Name	ID	Fold change BSA	log2FC	p value	minus log 10 p value
SMYD1	JHU18595.B24C20R21	14.5387	3.86182	6.39537e-06	5.19413
ALG2	JHU12064.B15C25R7	14.4192	3.84992	0.0181254	1.74171
KCTD10	JHU07340.B7C21R57	4.7102	2.23579	0.00239763	2.62022
Esrrb	JHU19571.B20C2R35	4.67439	2.22478	0.00582027	2.23506
MLIP	JHU04813.B7C1R17	3.77708	1.91727	0.000436914	3.3596
PEA15	JHU18212.B23C15R15	3.68005	1.87973	0.0106037	1.97454
DDX53	JHU16271.B19C24R13	3.30183	1.72327	0.00937644	2.02796
DDX19B	JHU08570.B10C17R15	3.2798	1.71361	0.0138881	1.85736
AMN1	JHU15481.B19C24R1	3.26685	1.7079	0.0264403	1.57773
TCOF1	JHU08626.B9C29R17	3.06542	1.61609	0.00253237	2.59647
CSTA	JHU04629.B5C26R17	3.00888	1.58923	0.0104642	1.98029
TNNC2	JHU02011.B3C20R35	2.88103	1.52658	0.00667614	2.17547
KIZ	JHU16162.B19C27R13	2.81286	1.49204	0.00465723	2.33187
ACPT	JHU19449.B17C14R55	2.79391	1.48228	0.0289959	1.53766
DDX43	JHU09623.B11C15R33	2.76363	1.46657	0.0338674	1.47022
RBP7	JHU10050.B19C4R47	2.62294	1.39119	0.038987	1.40908
BC067760.1_frag	JHU16303.B17C24R13	2.57872	1.36665	0.0049652	2.30406
ZBTB32	JHU08158.B11C26R11	2.57385	1.36393	0.000239307	3.62104
GNAZ	JHU05605.B19C16R41	2.49327	1.31804	0.028138	1.55071
SLC40A1	JHU07572.B17C17R43	2.45427	1.29529	0.010097	1.99581
SH3BGR	JHU11686.B15C27R1	2.42769	1.27959	0.0214943	1.66768
LCE4A	JHU16873.B19C24R55	2.3989	1.26237	0.0210073	1.67763
GOLGA7	JHU16282.B19C24R17	2.3655	1.24215	0.0178676	1.74793
VSIG1	JHU05658.B19C24R39	2.35678	1.23682	0.00593026	2.22693
WWTR1	JHU12725.B15C26R23	2.33536	1.22364	0.0371548	1.42999
MRPS12	JHU02257.B1C21R31	2.32905	1.21974	0.0166804	1.77779
SP2	JHU02096.B4C22R31	2.31448	1.21069	0.0360314	1.44332
NPPA	JHU02071.B17C13R21	2.31034	1.20811	0.00807793	2.0927
LIMCH1	JHU07124.B7C24R53	2.30976	1.20774	0.00165176	2.78205
GPR89A	JHU02242.B4C2R37	2.30289	1.20345	0.00219675	2.65822
CGREF1	JHU02997.B2C18R45	2.30222	1.20303	0.00228103	2.64187
ARHGEF7	JHU16343.B19C31R13	2.29129	1.19616	0.00839176	2.07615
SEPT2	JHU13883.B14C29R39	2.27387	1.18515	0.024107	1.61786
DCAF8	JHU15856.B19C27R11	2.2711	1.18339	0.0318097	1.49744
LOC101929479_frag	JHU09632.B11C2R33	2.26806	1.18146	0.00489395	2.31034
ZNF16	JHU05756.B5C13R29	2.26066	1.17674	0.00454092	2.34286
RCL1	JHU02665.B1C28R41	2.25416	1.17259	0.00893956	2.04868
ORMDL2	JHU00928.B4C22R17	2.24842	1.16891	0.036186	1.44146
ACD	JHU05281.B7C13R23	2.22855	1.15611	0.0197862	1.70364
EXOSC4	JHU05213.B5C24R21	2.22319	1.15263	0.00735668	2.13332
CLDND1	JHU04819.B5C19R17	2.22247	1.15216	0.00491252	2.3087
PNKD	JHU02266.B1C13R33	2.21439	1.14691	0.00980432	2.00858
ZBTB2	JHU19957.B19C26R41	2.20758	1.14247	0.0182598	1.7385
IGHG1	JHU16425.B19C2R23	2.20589	1.14136	0.0125731	1.90056
TECRL	JHU11690.B15C17R5	2.19226	1.13242	0.00719432	2.14301
PIPSL	JHU16224.B19C32R17	2.19043	1.13121	0.00303564	2.51775
IGHG1	JHU15226.B15C10R55	2.18956	1.13064	0.00539969	2.26763
RNF113A	JHU01115.B1C31R13	2.18737	1.1292	0.0283964	1.54674
MCM8	JHU15813.B17C22R7	2.18261	1.12605	0.00915207	2.03848
GNAQ	JHU07135.B5C1R49	2.17432	1.12056	0.0358443	1.44558
MPV17L2	JHU15984.B19C31R45	2.17287	1.1196	0.0038852	2.41059
MIDN	JHU16117.B19C2R13	2.16745	1.116	0.00582056	2.23504
OGFOD3	JHU15317.B19C20R3	2.16124	1.11186	0.0345994	1.46093
CAPZA1	JHU02890.B4C1R45	2.15709	1.10909	0.00553357	2.25699
PRKCB	JHU10805.B11C12R49	2.1527	1.10614	0.00628169	2.20192
NG_008285.1_frag	JHU03335.B3C24R51	2.14954	1.10403	0.0115767	1.93641
IGKC	JHU08867.B11C12R19	2.14847	1.10331	0.0021667	2.6642
WFDC5	JHU05277.B7C19R23	2.14351	1.09997	0.0134104	1.87256
BC031277.1_frag	JHU15431.B19C32R5	2.13599	1.09491	0.00166501	2.77858
CLEC7A	JHU15301.B17C3R1	2.13263	1.09263	0.00571236	2.24318
CABS1	JHU05670.B19C4R41	2.1297	1.09065	0.0264718	1.57722
BC073758	JHU16427.B19C23R21	2.12579	1.088	0.0245507	1.60994
TXNDC5	JHU06232.B5C26R37	2.12492	1.08741	0.00329583	2.48204
PNP	JHU10998.B11C25R53	2.12404	1.08681	0.00669738	2.1741
MRPL55	JHU11564.B15C3R3	2.1232	1.08624	0.0142542	1.84606
BRSK2	JHU00107.B4C27R1	2.11306	1.07933	0.0147799	1.83033
EVI2B	JHU02049.B4C17R31	2.11005	1.07728	0.0262974	1.58009
ATPIF1	JHU04618.B7C2R17	2.10733	1.07542	0.00163136	2.78745
IGHD	JHU15222.B16C31R59	2.1071	1.07526	0.0397122	1.40108
FAM124B	JHU04344.B20C11R41	2.10474	1.07364	0.0198485	1.70227
EBI3	JHU02905.B1C19R45	2.1029	1.07238	0.0177421	1.75099
BCKDHB	JHU15485.B19C1R5	2.09657	1.06803	0.0288828	1.53936
HLA-DMA	JHU04936.B19C8R25	2.09399	1.06625	0.0139951	1.85402
RAD51	JHU11109.B11C7R49	2.09261	1.0653	0.00157267	2.80336
LZTR1	JHU19825.B19C31R31	2.08649	1.06108	0.010822	1.96569
MRGPRD	JHU11381.B11C4R59	2.084	1.05935	0.0127574	1.89424
PGAM1	JHU15254.B15C31R57	2.08202	1.05799	0.045171	1.34514
EZR	JHU16385.B20C7R15	2.08105	1.05731	0.0125843	1.90017
PTGFR	JHU16553.B17C22R19	2.07629	1.054	0.00584772	2.23301
PIWIL1	JHU19835.B19C31R33	2.07595	1.05377	0.0484309	1.31488
SGOL1	JHU04485.B7C1R7	2.07559	1.05352	0.00496364	2.3042
PPP1R3C	JHU00158.B17C18R45	2.0746	1.05283	0.00859062	2.06598
STIP1	JHU15461.B17C17R5	2.07138	1.05059	0.00171307	2.76622
TMSB4X	JHU01816.B19C32R41	2.07096	1.0503	0.0315715	1.50071
VPS13B_frag	JHU08730.B19C13R23	2.06315	1.04485	0.00220394	2.6568
AK126796.1_frag	JHU19212.B19C6R49	2.06228	1.04424	0.000573951	3.24113
LIPN	JHU19023.B19C2R49	2.05618	1.03997	0.0338042	1.47103
CD244	JHU07116.B7C11R49	2.05117	1.03645	0.0110705	1.95583
PRRT1	JHU12990.B15C10R23	2.04916	1.03504	0.00833145	2.07928
BTN2A1	JHU05387.B5C15R27	2.04826	1.0344	0.00803277	2.09513
DARS2	JHU06739.B7C19R45	2.04788	1.03413	0.0235472	1.62806
LILRA5	JHU10603.B11C1R43	2.0463	1.03302	0.0243804	1.61296
SDS	JHU13668.B15C11R35	2.04336	1.03094	0.0260123	1.58482
CFAP36	JHU18245.B19C6R27	2.04104	1.02931	0.00233695	2.63135
EMD	JHU02236.B4C31R33	2.03945	1.02818	0.00511037	2.29155
SNX9	JHU14342.B15C14R43	2.03903	1.02788	0.0168375	1.77372
CT55	JHU11632.B15C14R1	2.03825	1.02733	0.0171764	1.76507
SLC27A6	JHU09390.B11C14R25	2.03716	1.02656	0.0108044	1.9664
ALG3	JHU09222.B11C12R29	2.03698	1.02643	0.0246553	1.60809
RBM23	JHU05153.B7C17R23	2.03592	1.02568	0.0116486	1.93373
ATCAY	JHU08359.B11C31R7	2.03452	1.02469	0.0266422	1.57443
BC047084.1_frag	JHU16617.B17C11R19	2.03442	1.02462	0.00413742	2.38327
NCKIPSD	JHU12684.B15C5R21	2.03018	1.02161	0.00916557	2.03784
AGO1	JHU09529.B11C10R29	2.0282	1.0202	0.0452197	1.34467
Banf1	JHU19561.B19C12R35	2.0254	1.01821	0.0130921	1.88299
CTNNA1	JHU05980.B6C16R35	2.02192	1.01572	0.00789069	2.10288
HSPB6	JHU13928.B17C11R43	2.02078	1.01492	0.0155797	1.80744
SRSF5	JHU04389.B7C14R11	2.0199	1.01428	0.0237403	1.62451
ERO1A	JHU13229.B3C31R5	2.01591	1.01143	0.024345	1.61359
HOOK1	JHU14013.B15C24R37	2.01549	1.01113	0.00963924	2.01596
PLEKHS1	JHU15488.B17C19R1	2.00533	1.00384	0.0220113	1.65735
PHYKPL	JHU02113.B1C16R33	2.00427	1.00307	0.00358096	2.446
CCDC126	JHU09902.B11C31R31	2.00341	1.00246	0.00205045	2.68815
HSFX1	JHU01774.B19C26R47	2.00188	1.00136	0.0265884	1.57531
ACER3	JHU26692.B22C2R69	0.499655	-1.00099	0.00771402	2.11272
BRD1	JHU18654.B22C3R65	0.493493	-1.0189	0.00362546	2.44064
NCOR1	JHU25814.B22C7R61	0.493493	-1.0189	0.00225207	2.64742
ZDHHC5	JHU22781.B22C4R59	0.487348	-1.03698	0.00979799	2.00886
SPAG1	JHU17679.B22C3R61	0.48642	-1.03973	0.00153406	2.81416
MTNR1A	JHU17073.B22C2R1	0.485219	-1.04329	0.0118333	1.9269
TMEM198	JHU26701.B22C2R71	0.481065	-1.0557	0.0218028	1.66149
FNDC7	JHU17050.B22C23R3	0.479934	-1.05909	0.031621	1.50002
WWC1	JHU25857.B22C7R63	0.471104	-1.08588	0.00339477	2.46919
C22orf42	JHU18656.B22C5R65	0.468831	-1.09286	0.0217819	1.6619
KIAA1211	JHU17996.B22C5R63	0.467192	-1.09791	0.00879808	2.05561
CDK15	JHU24933.B22C7R57	0.46559	-1.10287	0.0156248	1.80619
MAOA	JHU02165.B22C7R41	0.462763	-1.11166	0.0104699	1.98006
CCDC6	JHU16261.B17C7R25	0.460713	-1.11806	0.0113203	1.94614
VSIG2	JHU09309.B22C3R57	0.451	-1.1488	0.00384983	2.41456
FN3K	JHU14546.B14C3R53	0.450557	-1.15022	0.0221306	1.65501
C11orf54	JHU24858.B22C7R55	0.442708	-1.17557	0.0238445	1.62261
SLC35E4	JHU20125.B22C5R71	0.426508	-1.22935	0.0122869	1.91056
INPP5B	JHU15235.B22C8R59	0.408281	-1.29237	0.00221113	2.65539
TRMU	JHU20111.B22C3R69	0.40206	-1.31452	0.049096	1.30895
HOXB4	JHU16744.B21C11R11	0.253968	-1.97728	0.00107281	2.96948
SLC13A4	JHU18407.B21C6R15	0.253968	-1.97728	0.000605691	3.21775
LARP1B	JHU24482.B21C12R65	0.253436	-1.98031	0.019157	1.71767
ZNF627	JHU18608.B21C26R23	0.253431	-1.98033	0.000996309	3.00161
TMEM171	JHU27145.B21C23R67	0.252953	-1.98306	0.000323008	3.49079
IGF2BP2	JHU22546.B21C16R55	0.252694	-1.98454	0.0050017	2.30088
GTPBP1	JHU18454.B21C10R17	0.252659	-1.98474	0.000468286	3.32949
PRODH2	JHU17945.B21C32R33	0.252598	-1.98508	0.0105645	1.97615
ZNF154	JHU17867.B21C5R35	0.252492	-1.98569	0.00852652	2.06923
SLCO6A1	JHU18412.B21C4R17	0.252469	-1.98582	0.00220586	2.65642
ZSCAN23	JHU18609.B21C2R23	0.252467	-1.98583	0.0158596	1.79971
DYNLRB1	JHU04825.B21C3R53	0.252277	-1.98692	0.0065113	2.18633
TRIM71	JHU18137.B21C31R33	0.250829	-1.99522	0.00983077	2.00741
HIST1H1B	JHU18560.B21C3R23	0.250587	-1.99661	0.0057985	2.23668
TCEB3CL	JHU18573.B21C3R19	0.250193	-1.99889	0.00462667	2.33473
C5orf45	JHU12772.B21C27R51	0.250163	-1.99906	0.00674471	2.17104
WDR88	JHU24506.B21C23R63	0.249971	-2.00017	0.00121549	2.91525
PJA2	JHU13367.B21C3R45	0.248682	-2.00762	0.0214817	1.66793
INSM2	JHU16746.B21C4R9	0.24866	-2.00775	0.0101239	1.99465
DDX47	JHU09721.B21C7R47	0.248471	-2.00885	0.0148175	1.82922
SNX29P2	JHU26796.B21C12R67	0.247285	-2.01575	0.00418568	2.37823
CUL9	JHU17517.B21C9R25	0.246871	-2.01817	0.000681664	3.16643
HLA-F	JHU18846.B21C2R37	0.246712	-2.0191	0.00359104	2.44478
ANKRD17	JHU24446.B21C12R63	0.246331	-2.02133	0.00304797	2.51599
ADRA1D	JHU17598.B21C11R25	0.246224	-2.02195	0.00430303	2.36623
KRTAP5-2	JHU17545.B21C14R29	0.245519	-2.02609	0.0130331	1.88495
KERA	JHU18376.B21C4R15	0.245314	-2.0273	0.00481949	2.317
PRKCQ	JHU11774.B21C13R47	0.244706	-2.03088	0.00791066	2.10179
GPR135	JHU18364.B21C1R17	0.244268	-2.03347	0.0192204	1.71624
SPOCK3	JHU09969.B21C5R55	0.243767	-2.03643	0.000847639	3.07179
MTRF1L	JHU27027.B21C26R71	0.241589	-2.04937	0.000533228	3.27309
FAM27E3	JHU08092.B21C2R39	0.241437	-2.05028	8.59645e-05	4.06568
MBD3L2	JHU25704.B21C24R65	0.24127	-2.05128	0.0015468	2.81057
KIAA1644	JHU19303.B21C29R55	0.240925	-2.05334	0.0111813	1.95151
IL36RN	JHU13059.B21C5R45	0.240863	-2.05371	0.0111641	1.95217
TMEM5	JHU18228.B21C5R13	0.238547	-2.06765	0.00725303	2.13948
MAL2	JHU24055.B21C1R57	0.237431	-2.07442	0.00167935	2.77486
RAF1	JHU01035.B21C1R49	0.236872	-2.07782	0.0173028	1.76188
ASPH	JHU24728.B21C32R61	0.235022	-2.08913	0.0026976	2.56902
ZNF660	JHU16801.B21C1R7	0.234852	-2.09017	0.0177469	1.75088
FAM160B2	JHU01175.B21C10R47	0.23354	-2.09826	0.00493578	2.30664
TNS2	JHU19435.B21C7R45	0.23346	-2.09875	0.0167356	1.77636
TBX1	JHU16772.B21C25R11	0.23343	-2.09894	0.0193206	1.71398
SORCS2	JHU18131.B21C30R33	0.232012	-2.10773	0.000520027	3.28397
INHBC	JHU18916.B21C27R47	0.231614	-2.11021	0.0049922	2.30171
ZNF705D	JHU16714.B21C9R11	0.231118	-2.1133	0.00886332	2.0524
GZF1	JHU16741.B21C1R11	0.230987	-2.11411	0.00014061	3.85198
SURF6	JHU04017.B21C2R51	0.230801	-2.11528	0.00422889	2.37377
WHSC1	JHU24734.B21C22R63	0.230576	-2.11668	0.00132972	2.87624
WNT8B	JHU17686.B21C1R27	0.229953	-2.12059	0.00305625	2.51481
LAMA3	JHU25888.B21C7R63	0.229333	-2.12448	0.00148373	2.82864
ALDH1L1	JHU25146.B21C7R55	0.228515	-2.12964	0.000955077	3.01996
FOXE1	JHU17633.B21C4R25	0.22717	-2.13816	0.000628901	3.20142
AKAP7	JHU24549.B21C4R63	0.22575	-2.1472	6.5946e-06	5.18081
ADAMTS19	JHU19354.B21C27R57	0.222669	-2.16703	0.000886017	3.05256
CHEK2	JHU20057.B21C26R61	0.222564	-2.16771	0.00377581	2.42299
CACNA2D4	JHU18537.B21C28R59	0.221888	-2.1721	0.0180498	1.74353
KRT222	JHU18468.B21C7R15	0.220026	-2.18425	0.00180889	2.74259
SRSF10	JHU04927.B21C28R47	0.218699	-2.19298	0.0113816	1.9438
GGA1	JHU20149.B21C2R67	0.216807	-2.20552	0.00245441	2.61005
DDX24	JHU20354.B21C11R59	0.216117	-2.21011	0.00156474	2.80556
C7orf55	JHU20606.B21C25R57	0.211285	-2.24274	0.0120067	1.92058
FGF2	JHU17895.B21C9R33	0.20962	-2.25415	0.00604986	2.21825
CIITA	JHU25727.B21C25R63	0.209102	-2.25772	0.00121552	2.91524
TRMT10C	JHU26834.B21C26R67	0.203478	-2.29706	0.00264236	2.57801
C1orf168	JHU18438.B21C7R13	0.202188	-2.30623	0.00459885	2.33735
CLUAP1	JHU14927.B14C20R55	0.197632	-2.33911	0.0186854	1.7285
CEP290	JHU25887.B24C2R67	0.167314	-2.57937	0.00270907	2.56718
ADD1	JHU00675.B1C31R11	0.0883542	-3.50056	0.00645702	2.18997

## Sheet: Case 3
Name	ID	Fold change	log2FC	p value	minus log 10 p value
H6PD	JHU16353.B9C10R75	2.89086	1.5315	0.00977712	2.00979
TEAD1	JHU29691.B17C29R27	2.74183	1.45514	0.0115461	1.93756
POLE3	JHU02079.B14C3R13	2.12714	1.08892	0.0070424	2.15228
SIRPD	JHU05354.B2C31R79	2.09088	1.06411	0.0440719	1.35584
ZBTB40	JHU19820.B13C30R5	2.01406	1.01011	0.0183271	1.73691
FAM134B_frag	JHU13234.B12C1R27	0.497637	-1.00684	0.00907549	2.04213
PEBP4	JHU07830.B8C29R31	0.494641	-1.01555	0.0110571	1.95636
TCEB2	JHU03155.B11C23R85	0.49336	-1.01929	0.000513655	3.28933
DGCR2	JHU07699.B8C26R31	0.489152	-1.03164	0.00759287	2.11959
SLC25A1	JHU13288.B12C6R25	0.487403	-1.03681	0.0229208	1.63977
INTU	JHU28124.B18C23R19	0.481111	-1.05556	0.0122277	1.91266
PGLS	JHU12788.B9C29R19	0.476899	-1.06824	0.0189775	1.72176
TIMELESS	JHU14349.B12C8R47	0.476011	-1.07093	0.00746165	2.12717
CRNN	JHU13904.B12C8R41	0.465657	-1.10266	0.0124515	1.90478
RNF157	JHU17948.B14C29R65	0.428509	-1.2226	0.00890453	2.05039
TMEM18	JHU08242.B8C29R39	0.421338	-1.24695	0.0289906	1.53774
RIPPLY1	JHU11968.B9C2R7	0.416944	-1.26208	0.00208857	2.68015
PHKA1	JHU19555.B13C14R49	0.416808	-1.26255	0.0437398	1.35912
TNNC2	JHU02011.B3C20R35	0.397869	-1.32964	0.00418509	2.3783
AKR1D1	JHU11044.B7C13R83	0.292116	-1.77539	0.0222535	1.6526
COPG1	JHU30389.B19C23R39	0.244613	-2.03143	0.00070606	3.15116
